# Supplementary material for: The Caenorhabditis elegans anchor cell transcriptome: ribosome biogenesis drives cell invasion through basement membrane
Source: Oxford University Press journal article supplement (doi:10.1242/dev.201570), 2023-04-11
Supplement: dev201570supp.pdf [file dev201570supp.pdf]

FIGURE S1

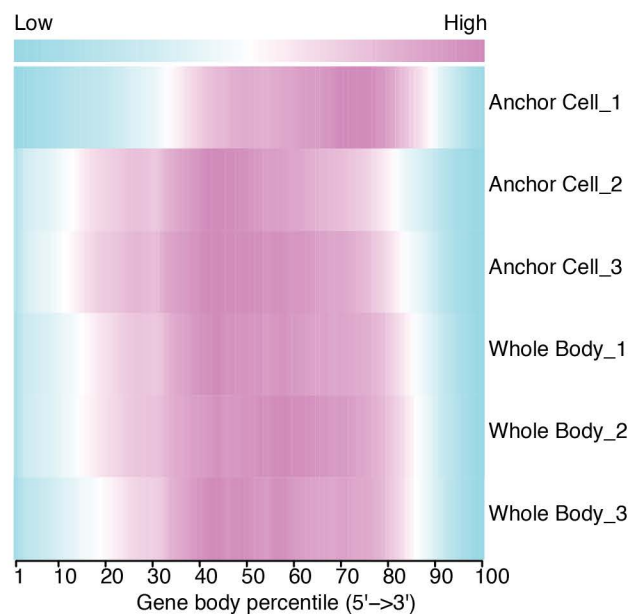

**Fig. S1. Gene body coverage analysis of single-cell RNA sequencing.**

Heatmap of read coverage profiles over gene body to evaluate uniformity of 5' to 3' coverage (pink = high coverage, blue = low coverage).

FIGURE S2

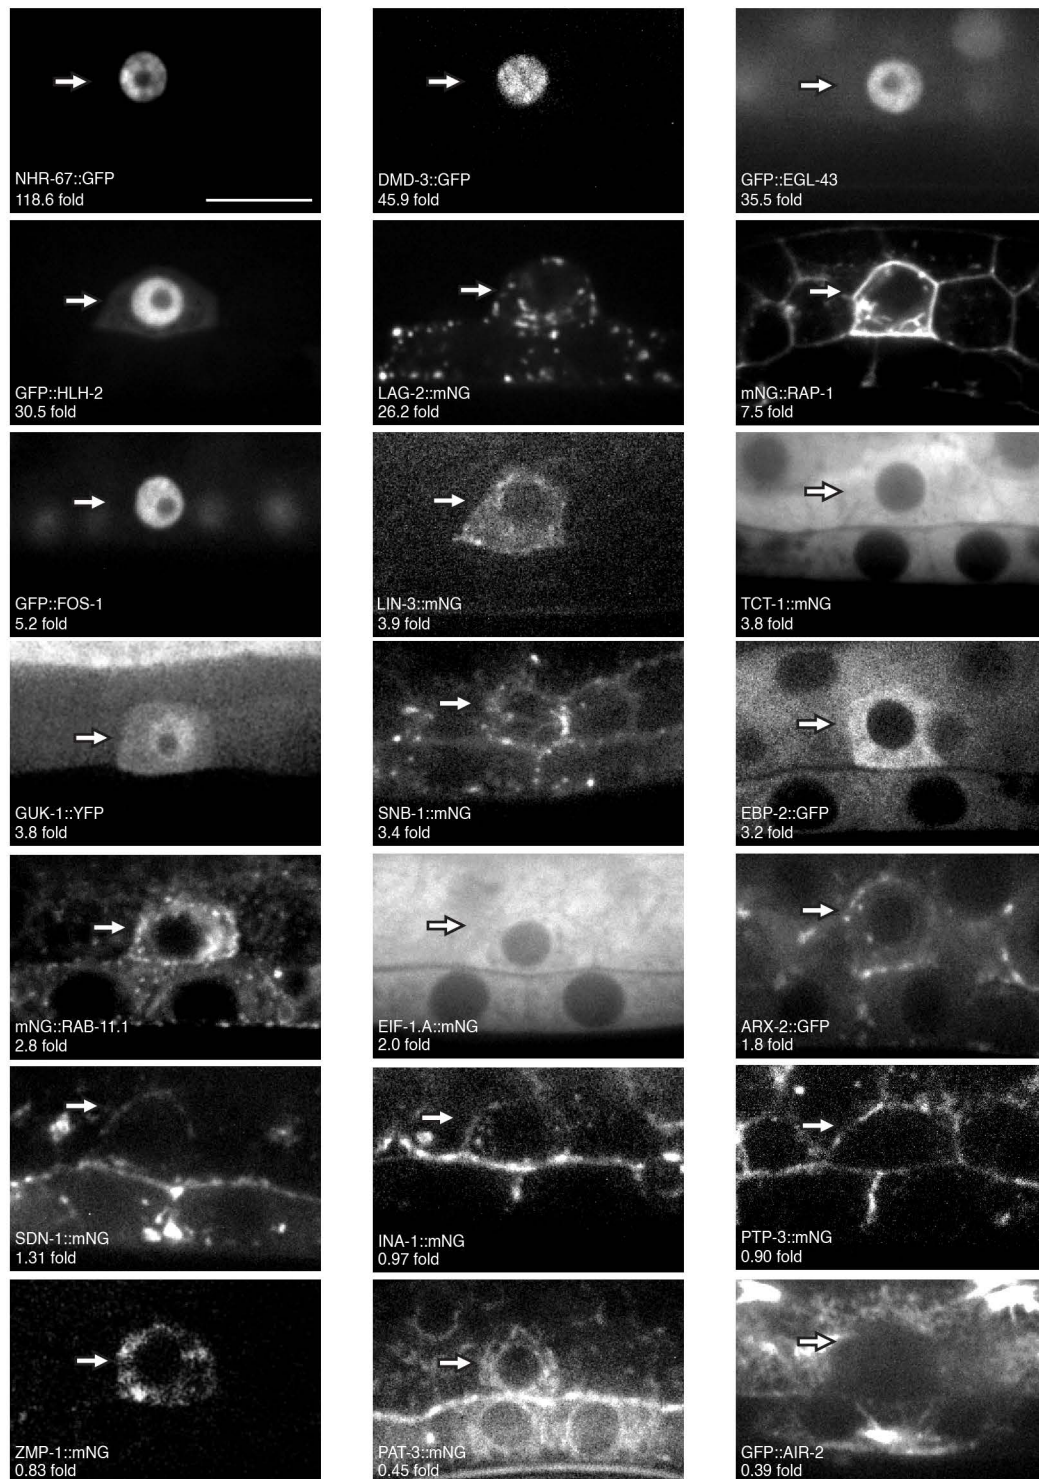

**Fig. S2. Levels of fluorescently tagged proteins of select AC transcriptome genes at the P6.p 2-cell AC.**

AC (arrows) protein expression of endogenous reporters generated through genome editing, except GUK-1::YFP which was generated as a translational reporter. Fold change of the AC compared to whole-body transcriptomes are shown (bottom left of each image). DMD-3, RAP-1, TCT-1, SNB-1, EBP-2, RAB-11.1, and AIR-2 are also shown in Figure 1, but included here for completeness. Scale bar: 5  $\mu$ m.

**FIGURE S3**

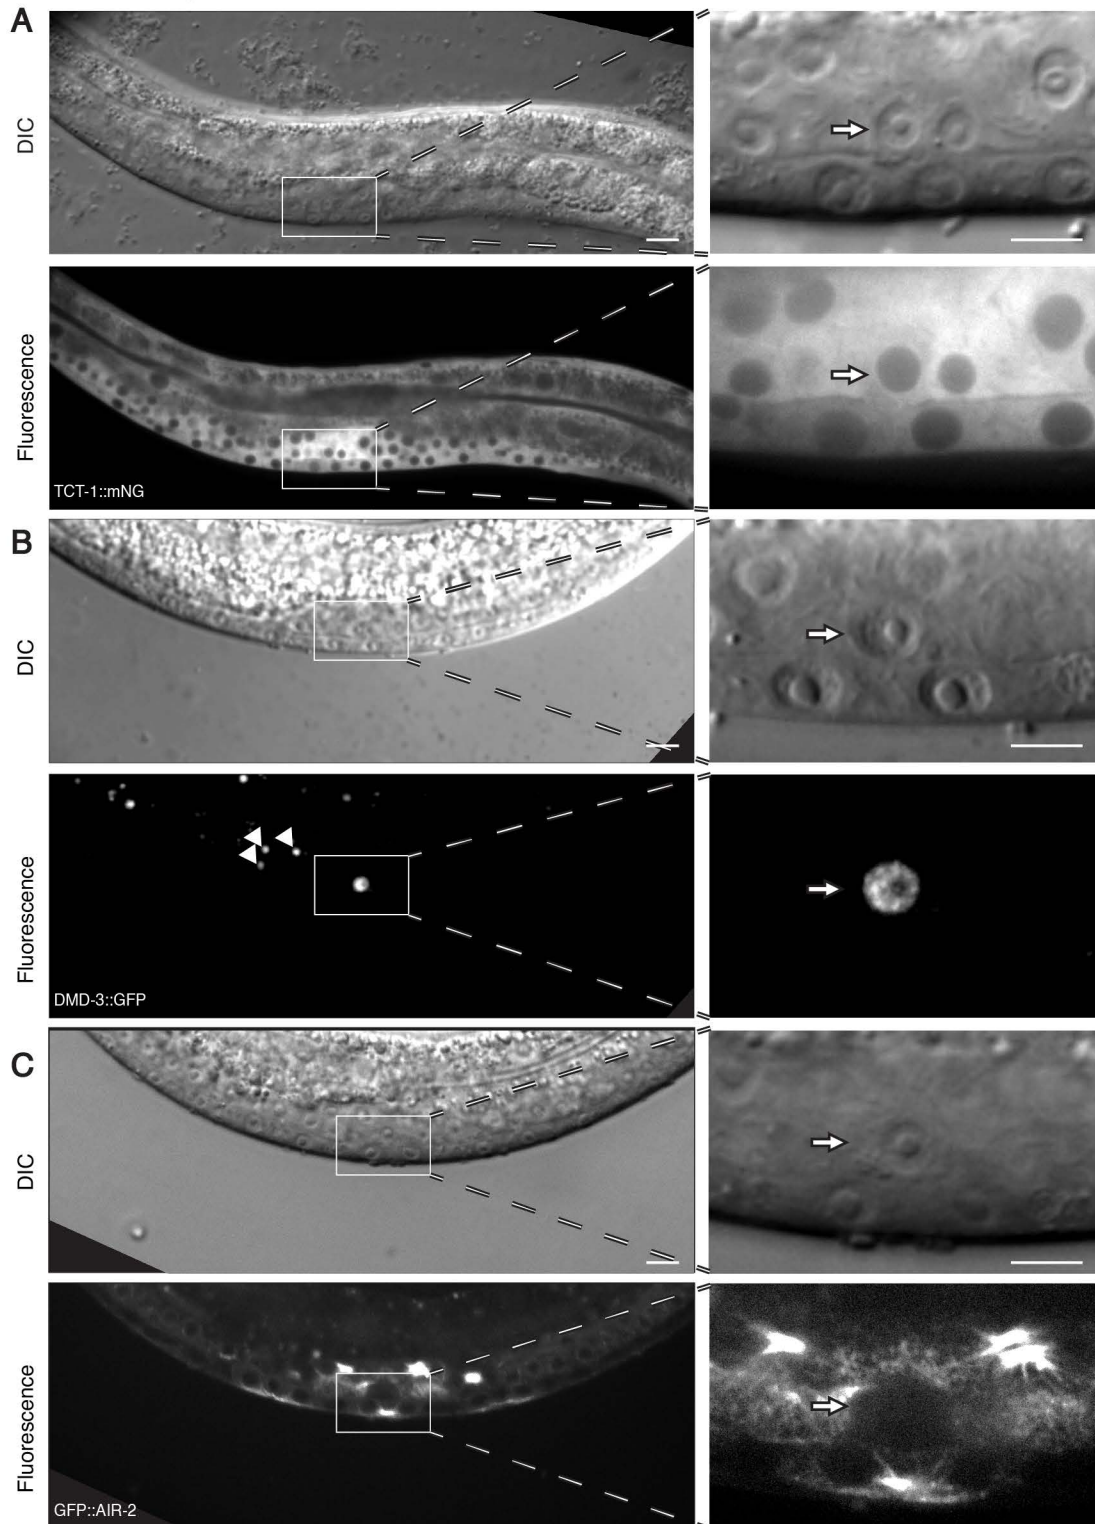

**Fig. S3. Levels and cellular distribution of endogenously tagged proteins of select AC enriched and underenriched genes.**

(A-C) Endogenous proteins in ACs (arrows) at the P6.p 2-cell stage when the AC transcriptome was generated. AC enrichment was based on comparison to WB gene expression at the same developmental stage. A central body view (left, 400x magnification) showing where the AC is located (box) is compared to a magnified view of the AC region (1000X magnification, right). Arrowheads indicate autofluorescent gut granules. Endogenous tagging of translational proteins generated from the highly enriched *tct-1* and *dmd-3* genes (A,B) and the underenriched *air-2* (C) gene. Scale bars: Left, 10  $\mu$ m. Right, 5  $\mu$ m.

FIGURE S4

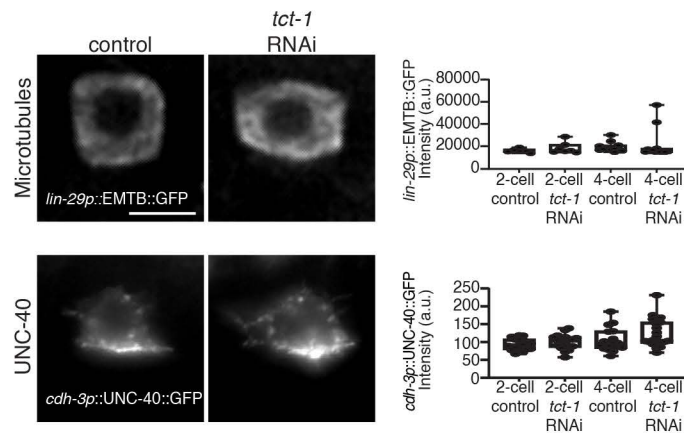

**Fig. S4. Loss of TCT-1 does not alter translation of AC-promoter driven transgenes.** AC promoters driving transgenes expressing proteins marking microtubules (*lin-29p::EMTB::GFP*) and UNC-40 (*cdh-3p::UNC-40::GFP*) in control empty vector RNAi and after *tct-1* RNAi treatment. Graphs show quantification of mean fluorescence intensity (right, boxplot  $n \geq 10$  each, unpaired two-tailed t-tests). Scale bar: 5  $\mu\text{m}$ .

FIGURE S5

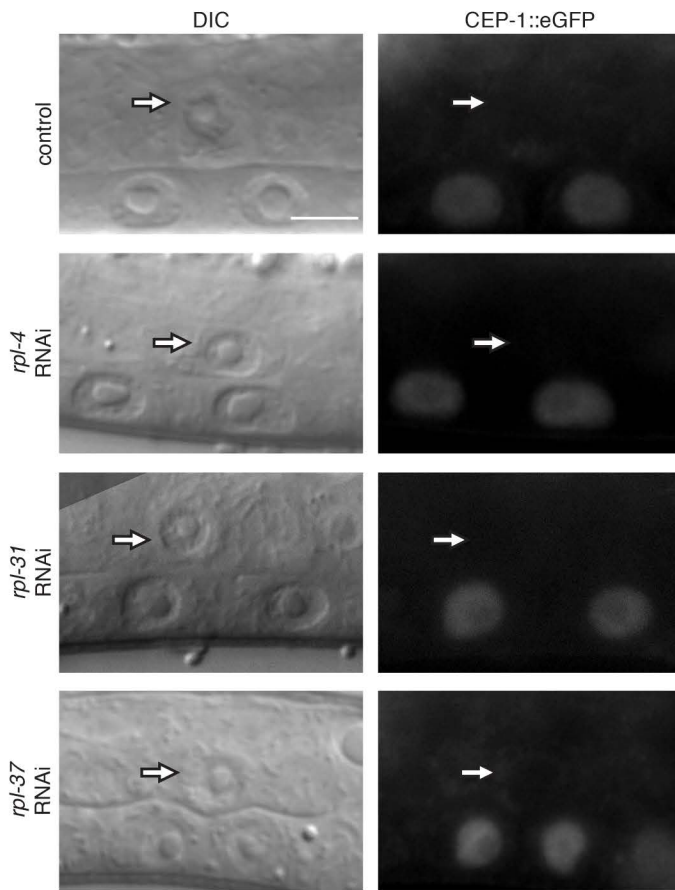

**Fig. S5. CEP-1 (p53) is not stabilized/activated in the AC after RNAi mediated reduction of large ribosomal subunit proteins.**

Examples of ACs (left, DIC; right, CEP-1::eGFP (p53); arrow) at the P6.p 2-cell stage after treatment with control RNAi and after RNAi mediated knockdown of *rpl-4*, *rpl-31*, and *rpl-37*. CEP-1::GFP was not detected in the AC after any treatment (n = 10 for each). Scale bars: 5  $\mu$ m.



**FIGURE S6**

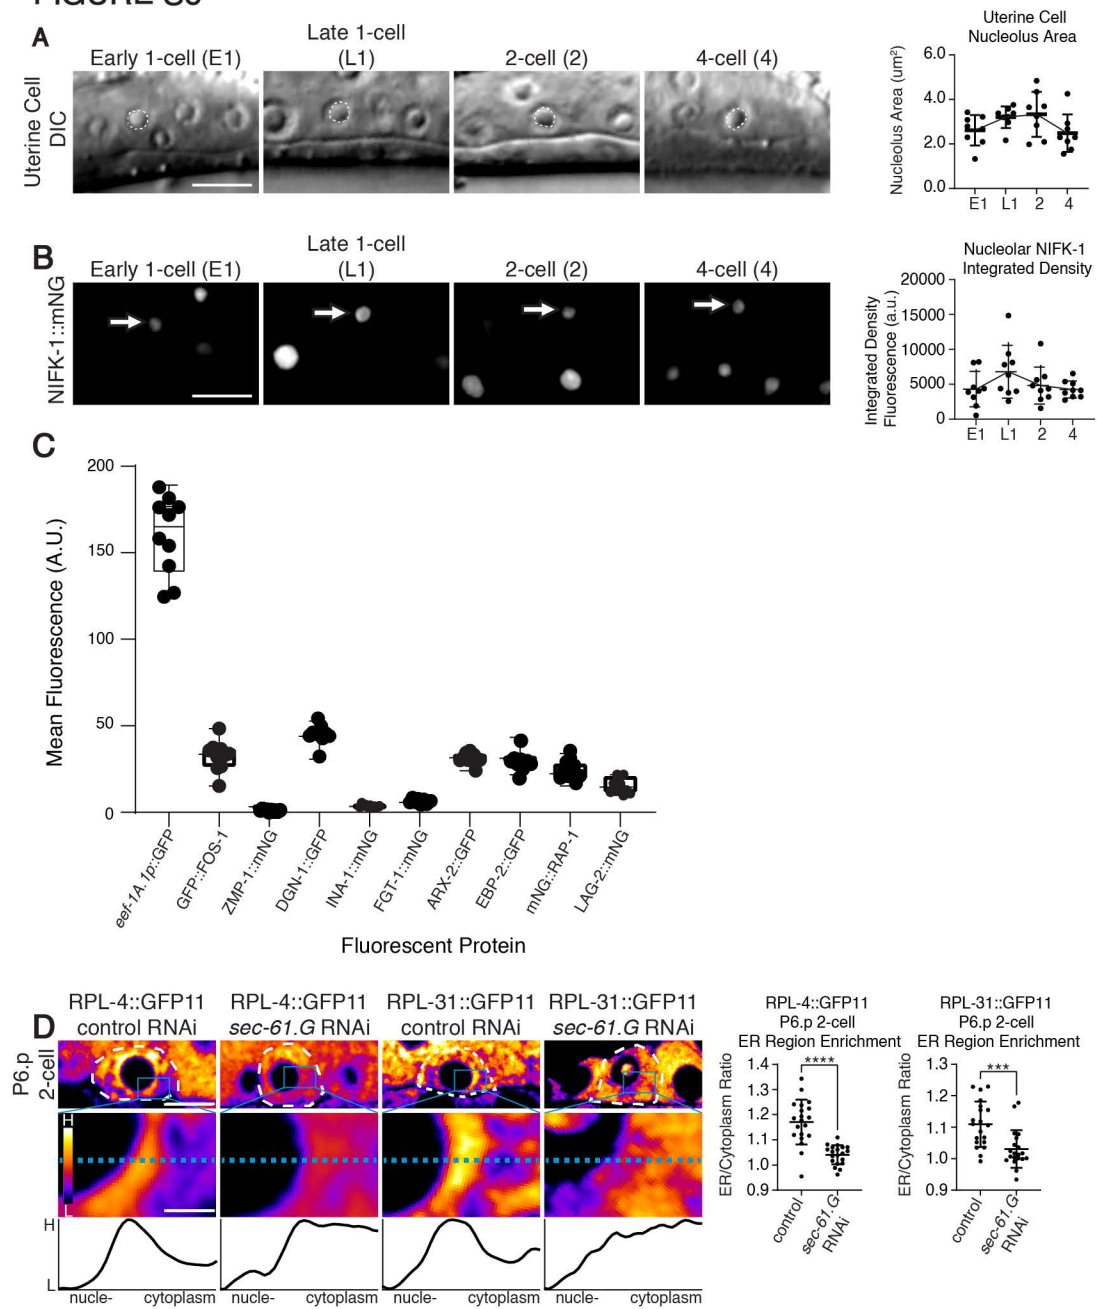



**Fig. S6. Uterine cell nucleolus size, AC NIKF-1::mNG expression, *eef-1a.1* promoter expression, *sec-61.G* RNAi and ribosome localization.**

(A) Timeline of nucleolus area (DIC images, dotted circles) of ventral uterine cells from the early P6.p 1-cell through the P6.p 4-cell stage. Graph shows quantification of nucleolus area over developmental time ( $n \geq 10$  ACs per timepoint each, mean  $\pm$  SD, one-way ANOVA with *post hoc* Tukey's test).

(B) The timeline of endogenous NIKF-1 (NIKF-1::mNG) expression in the AC (arrow). NIKF-1 shows a spike in levels at the P6.p late 1-cell stage. Graph shows quantification of total fluorescence levels (right) over developmental time ( $n \geq 10$  ACs per timepoint, mean  $\pm$  SD, one-way ANOVA with *post hoc* Tukey's test). Quantification is from one experiment in which several animals at each timepoint were processed in parallel.

(C) Fluorescence intensity of *eef-1a.1p::GFP* at the P6.p 2-cell stage is higher than all endogenously-tagged pro-invasive proteins ( $n \geq 8$  ACs per strain, boxplot).

(D) Spectral fluorescence-intensity map displaying the minimum and maximum pixel value range of the acquired data of RPL-31::GFP11 and RPL-4::GFP11 in the AC (dashed outlines) after control empty vector RNAi or *sec-61.G* RNAi treatment. Blue box depicts area containing the linescan. Linescan (blue dashed line, magnified bottom panels) shows peak levels of RPL-31::GFP11 and RPL-4::GFP11 surrounding the nucleus in control RNAi, whereas RPL-

31::GFP11 and RPL-4::GFP11 are more uniform in the cytosol after *sec-61.G* RNAi. Graphs show quantification of ER region to cytoplasm ratio in P6.p 2-cell ACs expressing RPL-

4::GFP11 or RPL-31::GFP11 in control empty vector RNAi and after *sec-61.G* RNAi treatment (boxplots,  $n \geq 20$  each, \*\*\* $p < 0.001$ , \*\*\*\* $p < 0.0001$ , unpaired two-tailed t-test). Scale bars: 1  $\mu$ m inset, 5  $\mu$ m all others.

**Table S1. Anchor cell (AC) transcriptome compared with mid L3 larval stage whole body (WB) gene expression.**

Three replicates of AC and WB gene expression profiles are shown. Genes are ordered based upon log2 fold change values (the log2 transformed ratio of the average of the 3 AC replicates normalized reads over the average of the 3 WB replicates normalized reads). Log2 fold change of 1 corresponds to a fold change of 2. Genes listed were considered to be part of the AC transcriptome if they had at least 10 reads in one of the three AC replicates.

[Click here to download Table S1](#)

**Table S2. AC transcripts with significantly enriched expression versus mid L3 larval stage WB expression.**

Three replicates of AC and WB gene expression profiles are shown. Genes are ordered based upon log2 fold change values (the log2 transformed ratio of the average of the 3 AC replicates normalized reads over the average of the 3 WB replicates normalized reads). Log2 fold change of 1 corresponds to a fold change of 2. A list of 1,502 AC genes with log2 fold change  $\geq 1$  compared with WB gene expression and an adjusted p-value  $< 0.1$ .

[Click here to download Table S2](#)

**Table S3. Analysis of transgenic and genome edited reporters of genes present in the AC transcriptome.**

Complete list of genes previously annotated and newly identified as having AC expression based on visual analysis of transgenic or endogenously tagged strains. Log2 fold change is shown for each gene (the log2 transformed ratio of the average of the 3 AC replicates normalized reads over the average of the 3 WB replicates normalized reads). Log2 fold change of 1 corresponds to a fold change of 2. Sources are listed by PubMed reference number (PMID).

[Click here to download Table S3](#)

**Table S4. Previously tagged genes visually examined for AC expression.**

A list of genes that were present at various levels in the AC transcriptome and examined for expression in the AC at the P6.p 2-cell stage. Expression was compared to other uterine and vulval cells using fluorescence microscopy, see Figures S2 and S3. Sources are listed by PubMed reference number (PMID).

| Gene          | Sequence ID | Source (PMID) | Notes                                                            | Fluorophore tagging method |
|---------------|-------------|---------------|------------------------------------------------------------------|----------------------------|
| <i>nhr-67</i> | C08F8.8     | 31806663      | nuclear hormone receptor<br>Tailless/TLX                         | endogenous tag             |
| <i>fos-1</i>  | F29G9.4     | 31806663      | basic leucine zipper<br>transcription factor Fos                 | endogenous tag             |
| <i>hlh-2</i>  | M05B5.5     | 31806663      | basic helix-loop-helix<br>transcription factor<br>E/Daughterless | endogenous tag             |
| <i>egl-43</i> | R53.3       | 31806663      | zinc-finger transcription<br>factor EVI1/MEL                     | endogenous tag             |
| <i>dmd-3</i>  | Y43F8C.10   | 30599092      | doublesex                                                        | endogenous tag             |
| <i>ina-1</i>  | F54G8.3     | 32585132      | alpha integrin                                                   | endogenous tag             |
| <i>pat-3</i>  | ZK1058.2    | 32585132      | beta integrin                                                    | endogenous tag             |
| <i>ptp-3</i>  | C09D8.1     | 32585132      | LAR-type receptor<br>phosphotyrosine-<br>phosphatases            | endogenous tag             |
| <i>sdn-1</i>  | F57C7.3     | 32585132      | syndecan                                                         | endogenous tag             |
| <i>lag-2</i>  | Y73C8B.4    | 30799241      | Notch receptor ligand                                            | endogenous tag             |
| <i>ebp-2</i>  | VW02B12L.3  | 30080857      | homolog of microtubule<br>tip tracking protein EBP-1             | endogenous tag             |
| <i>arx-2</i>  | K07C5.1     | 27780040      | Arp2/3 subunit                                                   | endogenous tag             |
| <i>rap-1</i>  | C27B7.8     | 28829947      | small GTPase                                                     | endogenous tag             |
| <i>guk-1</i>  | T03F1.8     | 20442418      | guanylate kinase                                                 | translational<br>reporter  |
| <i>air-2</i>  | B0207.4     | 34014923      | Aurora B                                                         | endogenous tag             |
| <i>zmp-1</i>  | EGAP1.3     | 30686527      | GPI anchored MMP                                                 | endogenous tag             |

**Table S5. Focused RNAi screen of AC enriched genes.**

A focused RNAi screen of AC enriched genes (versus WB gene expression) encoding transmembrane or secreted proteins, cytoskeleton component and regulators, and transcription factors. AC invasion was scored by assessing the presence of a basement membrane (BM) breach using *lam-1p::LAM-1::mCherry*.

[Click here to download Table S5](#)

**Table S6. Pathway analysis of AC enriched genes.**

Table of AC-enriched annotated terms and protein domains (referred to as pathways in text for simplicity) sorted by p-values identified using Database for Annotation, Visualization and Integrated Discovery (DAVID). Total genes annotated with the term or domain within the AC enriched genes is indicated in the Count column, while the Total genes annotated with Term/Domain lists the total number of genes in the *C. elegans* genome with that term or domain. Fisher Exact p-value was used for gene-enrichment analysis. Resource database used for each term or domain is shown. Notably, cuticular collagens were the most enriched genes in the AC. This is likely for a post-invasion role of the AC in contributing to the apical extracellular matrix of the vulva.

| Term/Domains<br>(Pathway)     | Count <sup>a</sup> | Total genes<br>annotated<br>with<br>Term/Domain <sup>b</sup> | p-value <sup>c</sup> | Resource Database |
|-------------------------------|--------------------|--------------------------------------------------------------|----------------------|-------------------|
| Cuticular Collagens           | 55                 | 147                                                          | 3.36E-24             | GOTERM_MF_DIRECT  |
| Proteasome                    | 17                 | 35                                                           | 1.09E-09             | UP_KEYWORDS       |
| Embryo Development            | 253                | 2788                                                         | 5.13E-05             | GOTERM_BP_DIRECT  |
| Protein<br>Heterodimerization | 15                 | 61                                                           | 0.000151             | GOTERM_MF_DIRECT  |
| Cytoskeleton                  | 28                 | 176                                                          | 0.000223             | GOTERM_CC_DIRECT  |
| Zinc Finger, C2H2             | 22                 | 151                                                          | 0.00372              | INTERPRO          |
| Translation Regulation        | 25                 | 181                                                          | 0.01                 | UP_KEYWORDS       |
| GTP binding                   | 26                 | 206                                                          | 0.0134               | GOTERM_MF_DIRECT  |
| Longin-like Domains           | 5                  | 16                                                           | 0.0265               | INTERPRO          |
| VHS                           | 3                  | 4                                                            | 0.0297               | INTERPRO          |

<sup>a</sup> The number of AC enriched genes (>2-fold enrichment) belonging to the Term/Domain.

<sup>b</sup> The total number of genes annotated by the resource database that match the Term/Domain.

<sup>c</sup> Fischer Exact 2x2 Tests computed by DAVID (see Methods).

**Table S7. AC transcriptome enriched translational regulators.**

Genes that encode translational regulators and are enriched within the AC transcriptome versus WB gene expression. Genes were identified using Database for Annotation, Visualization and Integrated Discovery (DAVID) and WormBase ParaSite Biomart was used to identify human orthologs (Methods).

| Gene            | Sequence ID | Human Ortholog | Ensembl Stable ID |
|-----------------|-------------|----------------|-------------------|
| <i>asd-1</i>    | R74.5       | RBFOX1         | ENSG00000078328   |
| <i>eif-1</i>    | T27F7.3     | EIF1B          | ENSG00000114784   |
| <i>ife-2</i>    | R04A9.4     | EIF4E2         | ENSG00000135930   |
| <i>ife-2</i>    | R04A9.4     | EIF4E3         | ENSG00000163412   |
| <i>ife-4</i>    | C05D9.5     | EIF4E2         | ENSG00000135930   |
| <i>mrps-11</i>  | W04D2.5     | MRPS11         | ENSG00000181991   |
| <i>rpl-5</i>    | F54C9.5     | RPL5           | ENSG00000122406   |
| <i>rpl-17</i>   | Y48G8AL.8   | RPL17          | ENSG00000265681   |
| <i>rpl-18</i>   | Y45F10D.12  | RPL18          | ENSG00000063177   |
| <i>rpl-19</i>   | C09D4.5     | RPL19          | ENSG00000108298   |
| <i>rpl-21</i>   | C14B9.7     | RPL21          | ENSG00000122026   |
| <i>rpl-25.2</i> | F52B5.6     | RPL23A         | ENSG00000198242   |
| <i>rpl-29</i>   | B0513.3     | RPL29          | ENSG00000162244   |
| <i>rpl-30</i>   | Y106G6H.3   | RPL30          | ENSG00000156482   |
| <i>rpl-31</i>   | W09C5.6     | RPL31          | ENSG00000071082   |
| <i>rpl-33</i>   | F10E7.7     | RPL35A         | ENSG00000182899   |
| <i>rpl-37</i>   | C54C6.1     | RPL37          | ENSG00000274242   |
| <i>rpl-38</i>   | C06B8.8     | RPL38          | ENSG00000172809   |
| <i>rpl-39</i>   | C26F1.9     | RPL39          | ENSG00000355315   |
| <i>rps-10</i>   | D1007.6     | RPS10          | ENSG00000124614   |
| <i>rps-22</i>   | F53A3.3     | RPS15A         | ENSG00000134419   |
| <i>snr-1</i>    | Y116A8C.42  | SNRPD3         | ENSG00000100028   |
| <i>snr-4</i>    | C52E4.3     | SNRPD2         | ENSG00000125743   |
| <i>snr-5</i>    | ZK652.1     | SNRPF          | ENSG00000139343   |
| <i>snr-6</i>    | Y49E10.15   | SNRPE          | ENSG00000182004   |
| <i>snrp-27</i>  | R05D11.7    | SNRNP27        | ENSG00000124380   |

**Table S8. Genetic mutants examined for AC invasion defects.**

A list of genetic mutants examined for AC invasion defects. AC invasion was scored by DIC microscopy and assessing the presence or break in the phase dense line under the AC, which corresponds to the BM.

|   | Identifier | Genotype                                                                                                                                                                                      | % ACs with incomplete invasion <sup>a</sup> | p-value <sup>b</sup> | n <sup>c</sup> |
|---|------------|-----------------------------------------------------------------------------------------------------------------------------------------------------------------------------------------------|---------------------------------------------|----------------------|----------------|
| 1 | N2         | Wild-type                                                                                                                                                                                     | 0%                                          | n/a                  | 50             |
| 2 | RB925      | <i>ire-1(ok799)</i> II                                                                                                                                                                        | 25%                                         | 0.001                | 20             |
| 3 | MC817      | <i>ddx-52(gc51)</i> I                                                                                                                                                                         | 16%                                         | 0.01                 | 25             |
| 4 | FK312      | <i>sma-5(n678)</i> X                                                                                                                                                                          | 0%                                          | ns                   | 25             |
| 5 | NK2694     | <i>qy110(rpl-31::GFP11)</i> I, <i>bmd15(eft-3p::GFP1-10::unc54 3'UTR-[let858 terminator]-myo-2p::mCherry-3xHA tbb-2 3'UTR)</i> I                                                              | 0%                                          | n/a                  | 41             |
| 6 | NK2902     | <i>qyls463(lin-29p::ZIF-1::SL2::mCh)</i> , <i>rpl-31(qy189[rpl-31::ZF1::GFP11])</i> I, <i>bmd15(eef-1A.1p::GFP1-10::unc-54 3'UTR; myo-2p::mCherry tbb-2 3'UTR)</i> I; <i>zif-1(gk117)</i> III | 45%                                         | <0.0001              | 40             |

<sup>a</sup> All animals were scored for invasion at the VPC P6.p 4-cell stage (see Figure 1A).

<sup>b</sup> Fischer Exact 2x2 Tests were used. Genetic mutants compared to N2 for statistical analysis. NK2902 was compared to NK2694 for statistical analysis.

<sup>c</sup> Number of animals observed for each condition.

**Table S9. Strains used in study.**

[Click here to download Table S9](#)

**Table S10. Oligonucleotide sequences used in genome edited strains and RNAi constructs.**

[Click here to download Table S10](#)
